# Supplementary material for: Psychological Impacts and Attitudes of the Syrian Population Regarding the COVID-19 Pandemic and Face Masks During the First Syrian Lockdown
Source: Research Square preprint supplement (doi:10.21203/rs.3.rs-528706/v1), 2021-06-03
Supplement: Supplementary file 1 [file add5f659435461cf48cf7ce4.docx]

**Appendix:**

**English Survey:**

| **Socio-demographic Characteristics** | |
| --- | --- |
| **Age (years):**  ⬜ 18-25 ⬜ 26-34 ⬜ 35-44  ⬜ 45-54 ⬜ > 55 | **Gender:**  ⬜ Male  ⬜ Female |
| **Marital status:**  ⬜ Single  ⬜ Married  ⬜ Other | **Educational level:**  **⬜** Primary school ⬜ Intermediate school ⬜ Secondary school ⬜ University/College ⬜ Master’s Degree ⬜ PhD Degree |
| **Occupation:**  ⬜ Healthcare worker ⬜ Government institution ⬜ Private institution ⬜ Business ⬜ Military ⬜ Student ⬜ Other | **Residence:**  ⬜ Damascus/Rural Damascus ⬜ Hama ⬜ Aleppo ⬜ Homs ⬜ Tartous ⬜ Lattakia ⬜ As-Sweida ⬜ Dara’a ⬜ Al Hasakah ⬜ Deir-ez-Zor ⬜ Idlib ⬜ Ar-Raqqah ⬜ Quneitra |
| **Area:**  ⬜ Rural  ⬜ Urban | **Economic Status:**  ⬜ Excellent ⬜ Good  ⬜ Moderate ⬜ Poor |
| **How many people do you live with?**  ⬜ Alone ⬜ 1-5 ⬜ > 5 | |

| **The following are questions related to COVID-19 attitudes and psychological impacts** | | | | |
| --- | --- | --- | --- | --- |
|  | **Not at all** | **A little bit** | **To some extent** | **A lot** |
| **1. How well do you find yourself prepared to face the national spread of the COVID-19 pandemic?** |  |  |  |  |
| **2. Are you abiding to home quarantine rules?** |  |  |  |  |
| **3. Is home quarantine causing an increase in family problems for you?** |  |  |  |  |
| **4. Does home quarantine have a positive impact on your psychological state?** |  |  |  |  |
| **5. Is the quarantine causing you to feel lazy and inactive?** |  |  |  |  |
| **The following are questions related to face mask attitudes, and psychological impacts** | | | | |
|  | | **Yes** | **No** | **IDK** |
| **6. Do you support wearing a mask on the street?** | |  |  |  |
| **7. Are you shy about wearing a mask in the street in front of people?** | |  |  |  |
| **8. Do you see an inferior view of those who wear the mask and consider it a shame?** | |  |  |  |
| **9. Do you worry about what people would say about you if you wore a mask?** | |  |  |  |
| **10. Would you stop wearing a mask if you are embarrassed or bullied by people?** | |  |  |  |
| **The following are questions related to COVID-19 control** | | | | |
| **11. Do you think the corona pandemic will be successfully controlled?** | |  |  |  |
| **12. Do you think that you or one of your relatives will be infected with the Coronavirus?** | |  |  |  |

**Arabic Survey:**

| **الخصائص الاجتماعية والديموغرافية** | |
| --- | --- |
| **العمر (سنوات):**  44-35⬜ 34-26⬜ 25-18⬜  ⬜ 54-45 ⬜ فوق 55 | **الجنس:**  ⬜ ذكر  ⬜ أنثى |
| **الحالة العائلية:**  ⬜عازب/عازبة  ⬜متزوج/متزوجة  ⬜أخرى | **المستوى التعليمي:**  المدرسة الابتدائية**⬜**  المدرسة الإعدادية⬜  المدرسة الثانوية⬜  ⬜جامعة/كليّة  ⬜شهادة ماجستير  ⬜شهادة دكتوراه |
| **العمل:**  ⬜ رعاية الصحية  ⬜مؤسسة حكومية  ⬜ مؤسسة خاصة ⬜ تجارة  ⬜ عسكري ⬜ طالب  ⬜أخرى | **مكان الإقامة:**  **⬜**دمشق/ريف دمشق ⬜ حماة ⬜حلب ⬜حمص ⬜طرطوس ⬜اللاذقية ⬜السويداء ⬜درعا ⬜الحسكة ⬜دير الزور ⬜ادلب ⬜الرقة ⬜القنيطرة |
| **المنطقة:**  ⬜ريف  ⬜مدينة | **الوضع المادي:**  ممتاز ⬜جيد⬜  متوسط ⬜منخفض⬜ |
| **عدد الأشخاص الذين تعيش معهم؟**  لوحدي ⬜ ⬜1-5 5<⬜ | |

| **بعض الأسئلة تتعلق بالسلوكيات والاعتقادات والممارسة حول COVID-19** | | | | |
| --- | --- | --- | --- | --- |
| **كثيرا** | **الى حد ما** | **قليلا** | **على الاطلاق** |  |
|  |  |  |  | **1. الى أي مدى تجد نفسك مستعداً لمواجهة الانتشار الوطني لفيروس كورونا؟** |
|  |  |  |  | **2. هل أنت ملتزم بقواعد الحجر المنزلي؟** |
|  |  |  |  | **3. هل الحجر المنزلي يتسبب في زيادة في المشاكل العائلية؟** |
|  |  |  |  | **4. هل للحجر المنزلي تأثير إيجابي على حالتك النفسية؟** |
|  |  |  |  | **5. هل تحافظ على مسافة مترين بينك وبين الناس عند الخروج من المنزل؟** |
|  |  |  |  | **6. هل يسبب لك الحجر المنزلي الشعور بالكسل والتقاعس عن العمل ؟** |
| **فيما يلي بعض الأسئلة المتعلقة بالكمامة والقفازات** | | | | |
| **لا أعلم** | **لا** | **نعم** |  | |
|  |  |  | **7. هل تؤيد ارتداء الكمامة و/او القفازات بالشارع؟** | |
|  |  |  | **8. هل تخجل من ارتداء الكمامة و/او القفازات في الشارع أمام الناس؟** | |
|  |  |  | **9. هل تنظر نظرة دونية لمن يرتدون الكمامة و/او القفازات وتعتبره أمرا مخجلا؟** | |
|  |  |  | **10. هل تقلق بشأن ما سيقوله الناس عنك إذا ارتديت الكمامة و/او القفازات؟** | |
|  |  |  | **11. هل ستتوقف عن ارتداء الكمامة و/او القفازات في حال تعرضك للاحراج أو التنمر من الناس؟** | |
|  |  |  | **12. هل تعتقد أنه سيتم السيطرة على جائحة الكورونا بنجاح؟** | |
|  |  |  | **11. هل تعتقد أنك ستصاب أنت أو أحد أقاربك بفيروس كورونا؟** | |
